# Supplementary material for: Transcriptome-Wide Identification and Quantification of Caffeoylquinic Acid Biosynthesis Pathway and Prediction of Its Putative BAHDs Gene Complex in A. spathulifolius
Source: MDPI journal article supplement (doi:10.3390/ijms22126333), 2021-06-13
Supplement: s1 [file s1]

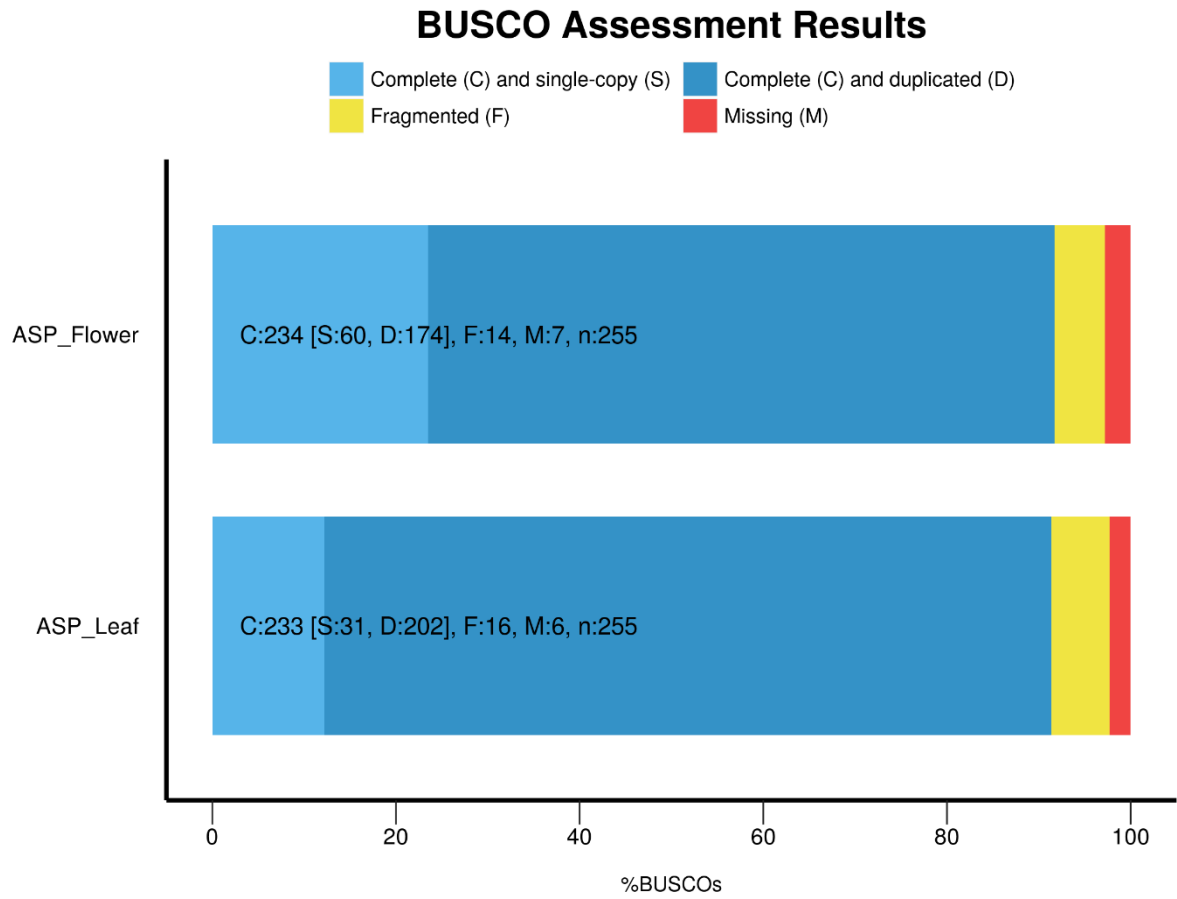

Figure S1. BUSCO assessments shows the quality of transcriptome assembled unigenes. C:complete, D: Duplicated, F: fragments, M: missing

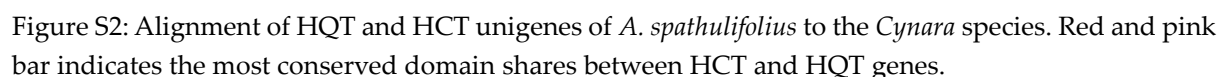

Figure S2: Alignment of HQT and HCT unigenes of *A. spathulifolius* to the *Cynara* species. Red and pink bar indicates the most conserved domain shares between HCT and HQT genes.

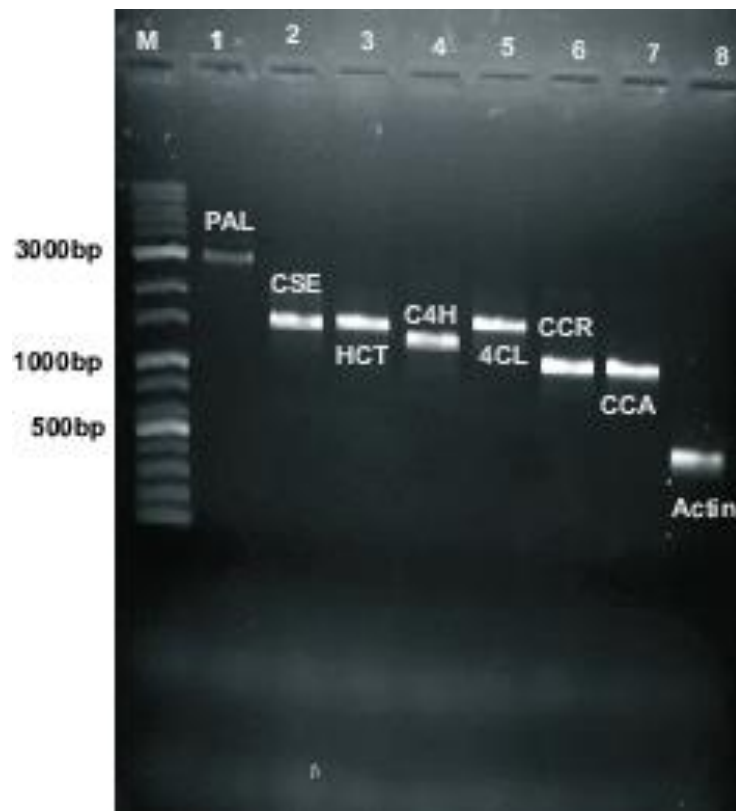

Figure S3 : RT-PCR conformation of PPP unigene in *A. spathulifolius* leaf of *denovo* assembled unigenes.
